# Supplementary material for: Computer Modeling Explains the Structural Reasons for the Difference in Reactivity of Amine Transaminases Regarding Prochiral Methylketones
Source: MDPI journal article supplement (doi:10.3390/ijms23020777), 2022-01-11

# Computer modelling explains structural reasons for the difference in reactivity of amine transaminases towards prochiral methylketones

Iris S. Teixeira,<sup>1</sup> André B. Farias,<sup>2</sup> Bruno A. C. Horta,<sup>2</sup> Humberto M. S. Milagre,<sup>1</sup> Rodrigo O. M. A. Souza,<sup>2</sup> Uwe T. Bornscheuer,<sup>3</sup> Cintia D. F. Milagre<sup>1</sup>

<sup>1</sup> Institute of Chemistry, UNESP – São Paulo State University, Araraquara, SP, Brazil

<sup>2</sup> Institute of Chemistry, Federal University of Rio de Janeiro, Rio de Janeiro, RJ, Brazil

<sup>3</sup> Department of Biotechnology & Enzyme Catalysis, Institute of Biochemistry, Greifswald University, Greifswald, Germany

## Supporting Information Data

Figure S1. Analytical curve – Bradford Assay

Figure S2. NMR Spectra <sup>1</sup>H (300.19 MHz, CDCl<sub>3</sub>) of amine **1b**

Figure S3. NMR Spectra <sup>13</sup>C (75.48 MHz, CDCl<sub>3</sub>) of amine **1b**

Figure S4. NMR Spectra <sup>1</sup>H (300.19 MHz, CDCl<sub>3</sub>) of amine **2b**

Figure S5. NMR Spectra <sup>1</sup>H (75.48 MHz, CDCl<sub>3</sub>) of amine **2b**

Table S1. The four best results for Blastp of ATA-256 sequence.

Table S2. Docking validation using redocking strategy with different scoring functions and radius around the reference atom. Rigid and flexible docking were performed.

Table S3: Comparison between interactions observed in docking studies of ATA-256 and *V. fluvialis* (4E3Q). Amino acids marked with \* represent that they belong to B chain.

Table S4: Comparison between interactions observed in docking studies of *C. violaceum*. Amino acids marked with \* represent that they belong to B chain.

Figure S6. Validation of model by z-score (A), local estimates based on the QMEAN scoring function (B) and ramachandran plot (C). Model of ATA-256 built by homology modeling (D) and the structural comparison with template 4E3Q (E).

Figure S7. Overview of protein structures and sequence of transaminase from *A. terreus* (A), *C. violaceum* (B), *R. pomeroyi* (C), *V. fluvialis* (D) and ATA-256 (E).

Figure S8. Analysis of interactions obtained by molecular docking of **2a** and **1a**.

Figure S1. Analytical curve – Bradford Assay

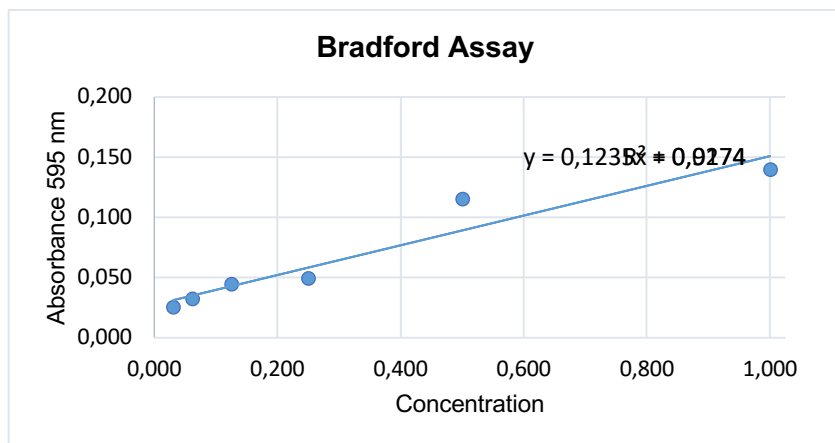

Figure S2. NMR Spectra  $^1\text{H}$  (300.19 MHz,  $\text{CDCl}_3$ ) of amine **1b**

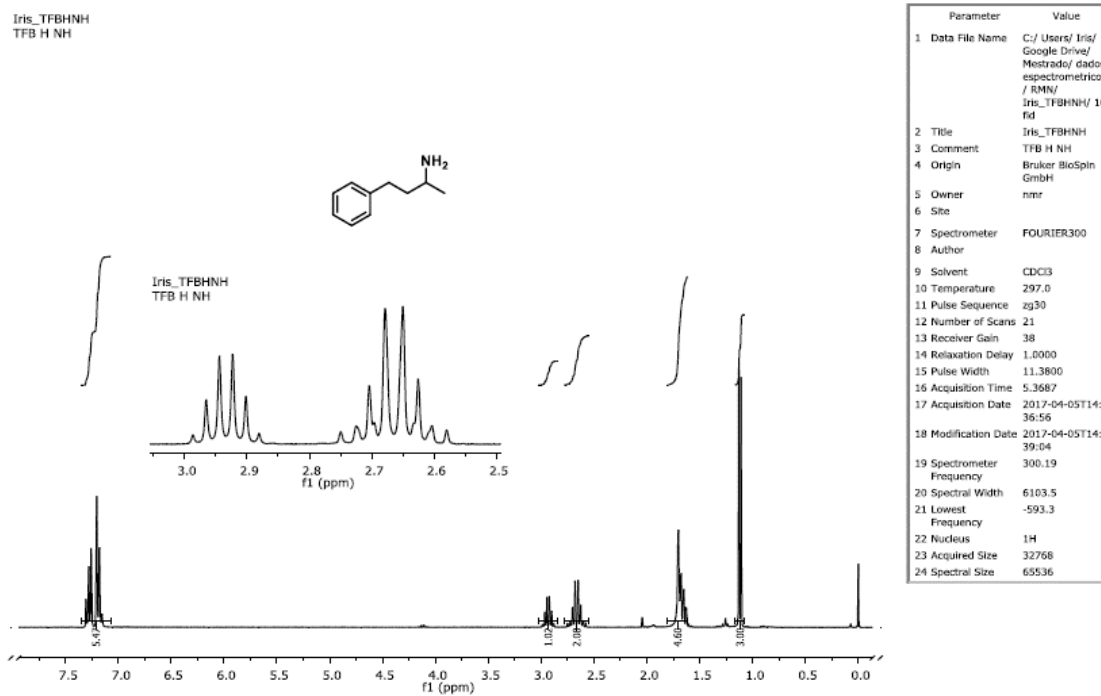

Figure S3. NMR Spectra  $^{13}\text{C}$  (75.48 MHz,  $\text{CDCl}_3$ ) of amine **1b**

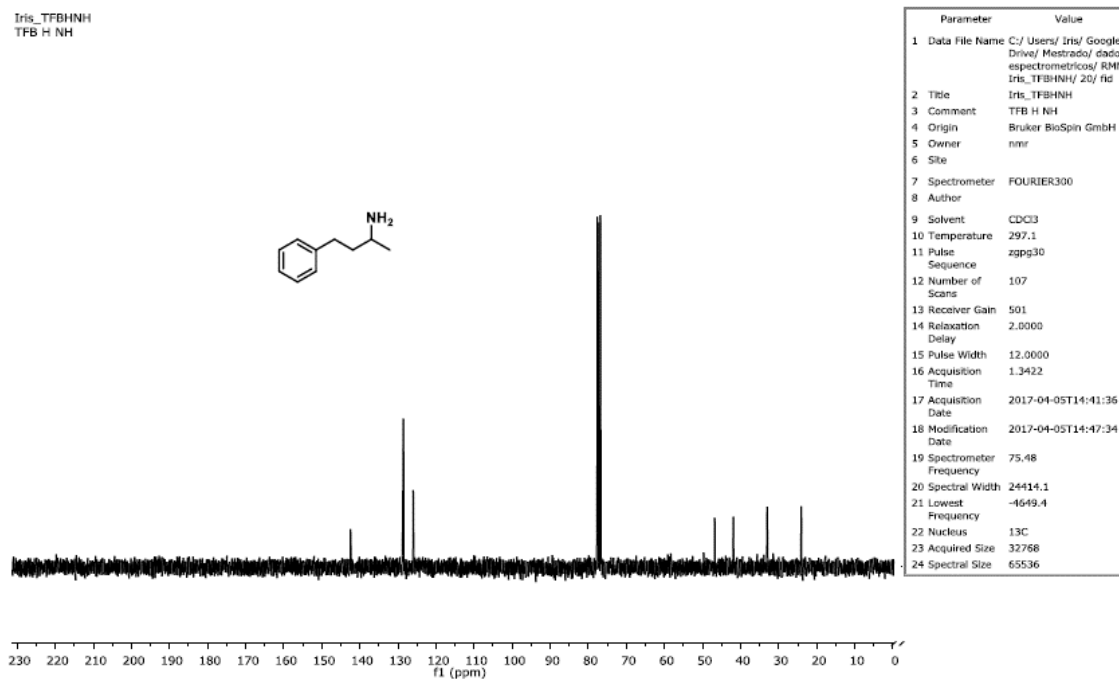

Figure S4. NMR Spectra  $^1\text{H}$  (300.19 MHz,  $\text{CDCl}_3$ ) of amine **2b**

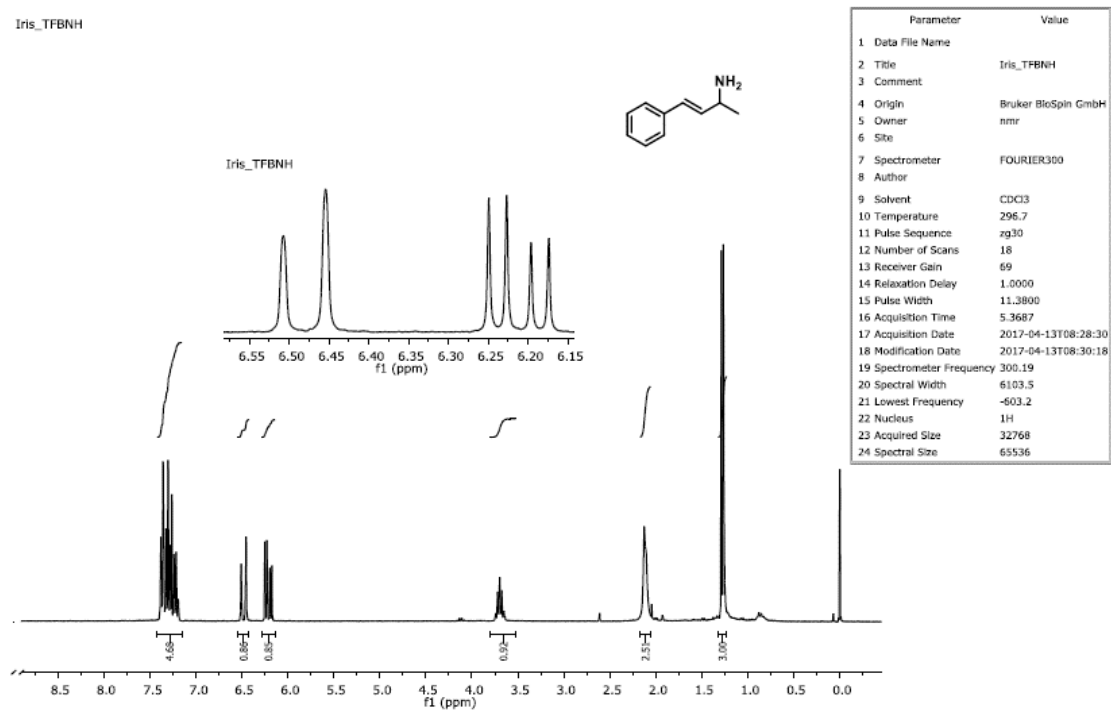



Figure S5. NMR Spectra  $^1\text{H}$  (75.48 MHz,  $\text{CDCl}_3$ ) of amine **2b**

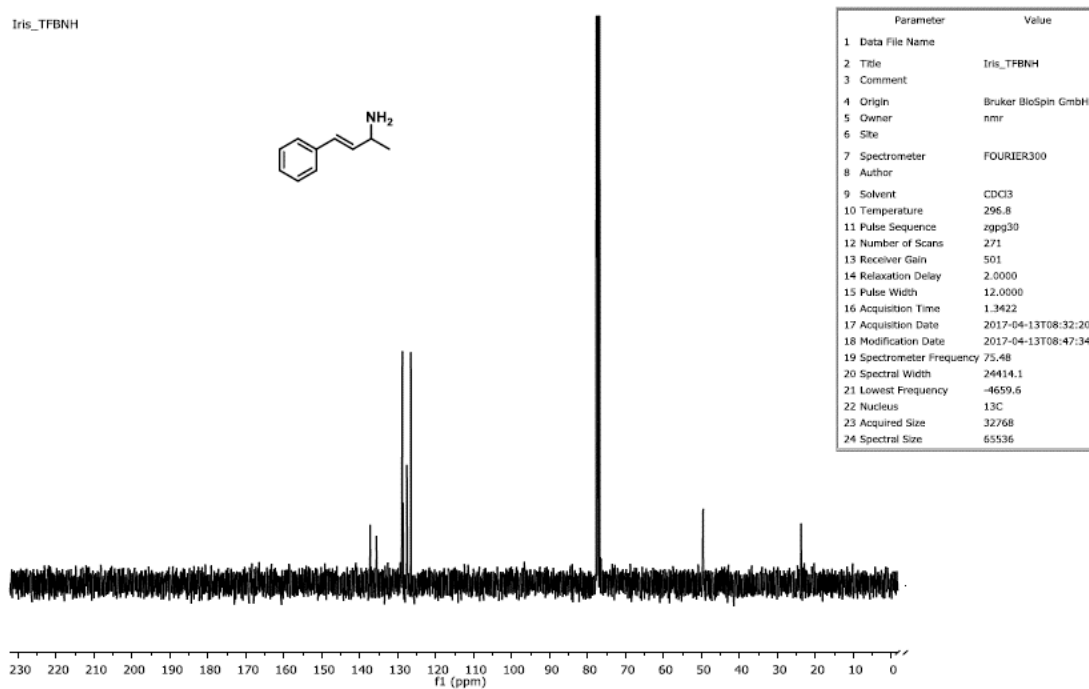

Table S1. The four best results for Blastp of ATA-256 sequence.

| PDB  | Cover (%) | Per. Identity (%) | Resolution (Å) | Organism            |
|------|-----------|-------------------|----------------|---------------------|
| 5ZTX | 100       | 94.04             | 2.00           | <i>V. fluvialis</i> |
| 3NUI | 100       | 94.04             | 2.00           | <i>V. fluvialis</i> |
| 4E3R | 100       | 92.49             | 1.90           | <i>V. fluvialis</i> |
| 4E3Q | 99.00     | 91.37             | 1.90           | <i>V. fluvialis</i> |

Table S2. Docking validation using redocking strategy with different scoring functions and radius around the reference atom. Rigid and flexible docking were performed.

| PDB code | Function          | Radius around ref. | RMSD   |
|----------|-------------------|--------------------|--------|
| 4CE5     | Chemplp (rigid)   | 20                 | 1.5321 |
|          | Chemscore (rigid) | 20                 | 0.9871 |
|          | Chemplp (flex)    | 20                 | 1.6915 |
|          | Chemplp (flex)    | 10                 | 1.7563 |
|          | Chemscore (flex)  | 20                 | 1.3967 |
|          | Chemscore (flex)  | 10                 | 1.5325 |
| 4E3Q     | Chemplp (flex)    | 20                 | 4.9960 |
|          | Chemplp (flex)    | 10                 | 0.5673 |
|          | Chemscore (flex)  | 20                 | 5.1090 |
|          | Chemscore (flex)  | 10                 | 2.8099 |

Table S3: Comparison between interactions observed in docking studies of ATA-256 and *V. fluvialis* (4E3Q). Amino acids marked with \* represent that they belong to B chain.

| Type           | ATA256      |             | 4E3Q        |             |
|----------------|-------------|-------------|-------------|-------------|
|                | 2a          | 1a          | 2a          | 1a          |
| Hbond          | 116         | 116         | -           | -           |
|                | 117         | 117         | 117         | 117         |
|                | 118         | 118         | 118         | 118         |
|                | 256         | 256         | -           | 256         |
|                | 285         | 285         | 285         | 285         |
|                | 322*        | 322*        | 322*        | 322*        |
| Van der Waals  | 15 residues | 14 residues | 11 residues | 16 residues |
| Unfavorable    | 119*        | 119*        | -           | 415         |
| Pi-Pi Stacking | -           | 19          | 19          | 19          |
|                | 150         | 150         | 150         | 150         |
| Alkyl/Pi-Alkyl | -           | -           | 56          | -           |
|                | 228         | 228         | 228         | 228         |
|                | 258         | 258         | 258         | 258         |
|                | 259         | 259         | 259         | 259         |
| Pi-cation      | 415         | 415         | 415         | 415         |

Table S4: Comparison between interactions observed in docking studies of *C. violaceum*. Amino acids marked with \* represent that they belong to B chain

| Type           | <i>C. violaceum</i> |             |
|----------------|---------------------|-------------|
|                | 2a                  | 1a          |
| Hbond          | 120                 | 120         |
|                | 121                 | 121         |
|                | -                   | 153         |
|                | 259                 | 259         |
|                | -                   | 288         |
|                | 321*                | 321*        |
| Van der Waals  | 15 residues         | 17 residues |
| Unfavorable    | 122*                | 122*        |
| Pi-Pi Stacking | 153                 | 153         |
|                | 154                 | -           |
|                | 88*                 | -           |
| Alkyl/Pi-Alkyl | 231                 | 231         |
|                | 261                 | 261         |
|                | -                   | 262         |

Figure S6. Validation of model by z-score (A), local estimates based on the QMEAN scoring function (B) and ramachandran plot (C). Model of ATA-256 built by homology modeling (D) and the structural comparison with template 4E3Q (E).

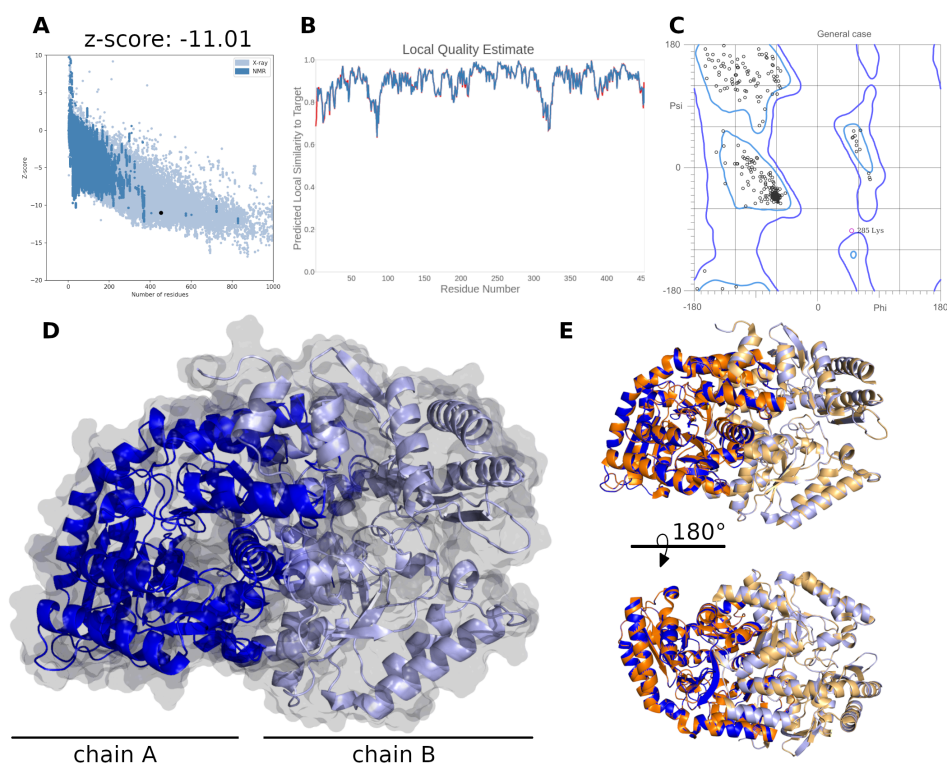

Figure S7. Overview of protein structures and sequences of the transaminase from *A. terreus* (A), *C. violaceum* (B), *R. pomeroiyi* (C), *V. fluvialis* (D) and ATA-256 (E).

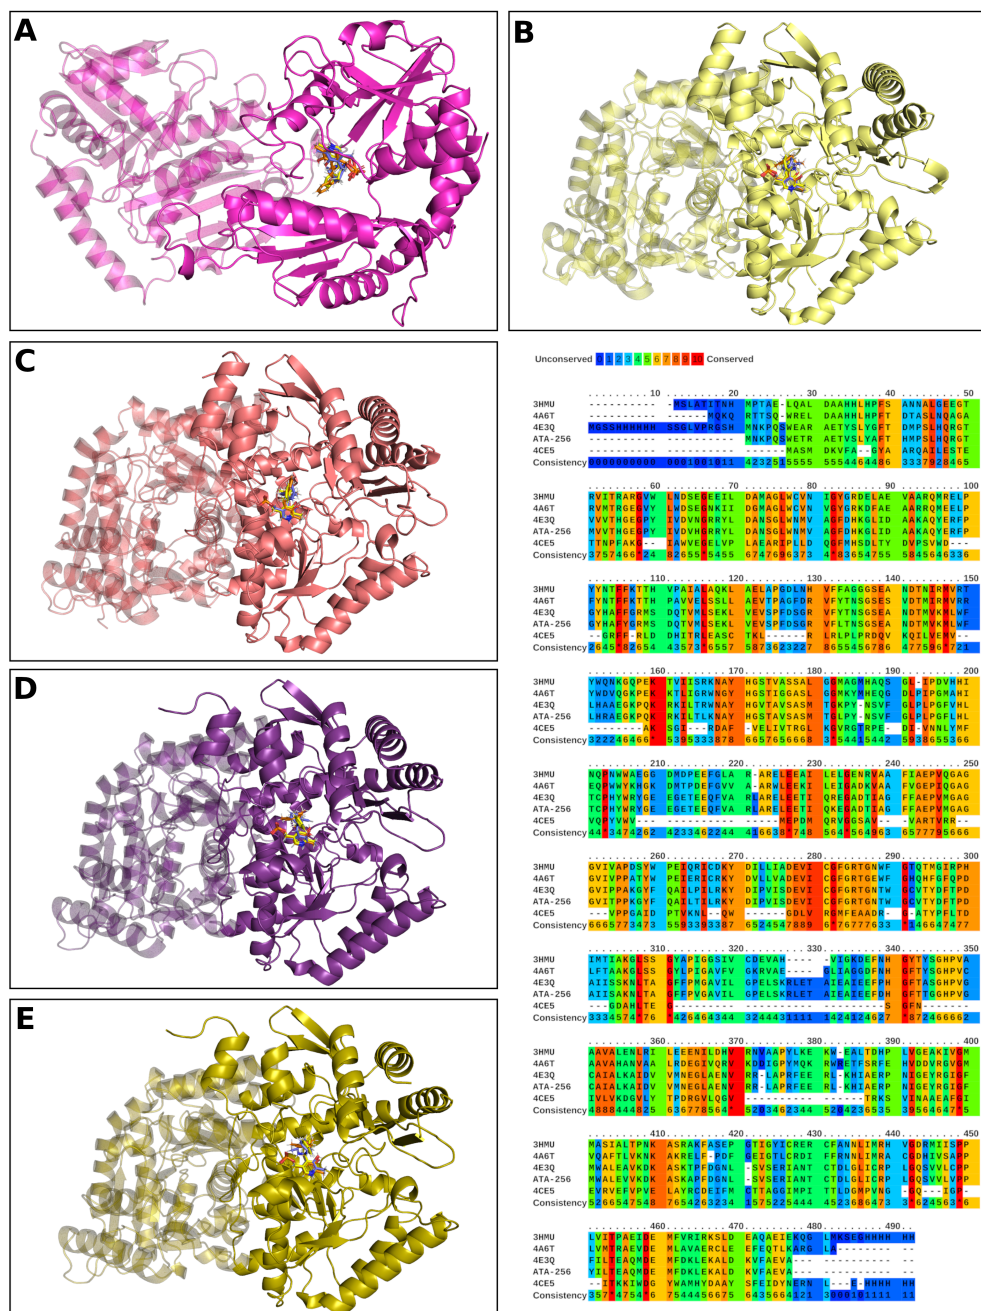

Figure S8. Analysis of interactions obtained by molecular docking of **2a** and **1a**.

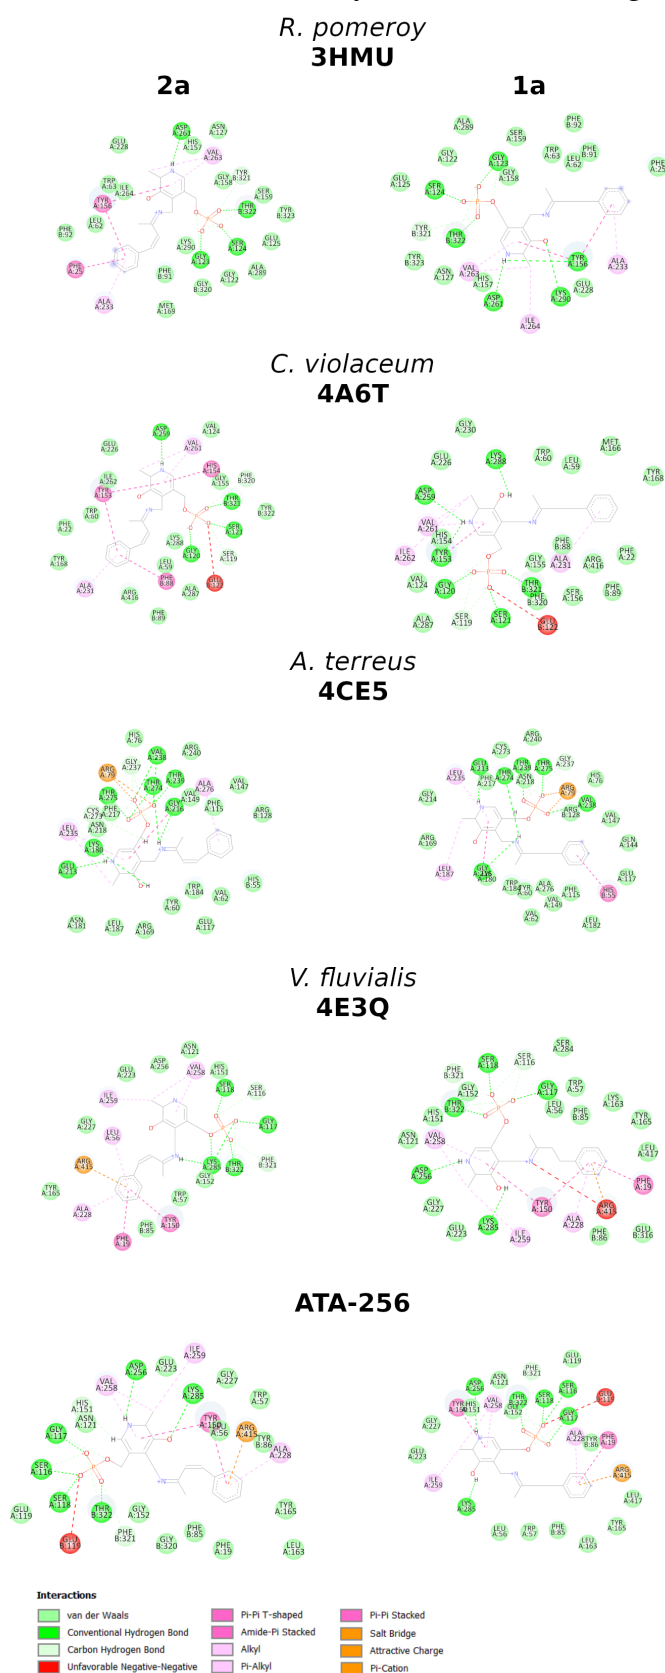

Supplement: s1 [file s1]
